# Supplementary material for: Microbial Community Composition and Diversity via 16S rRNA Gene Amplicons: Evaluating the Illumina Platform
Source: PLOS journal article supplement (doi:10.1371/journal.pone.0116955), 2015-02-03
Supplement: S12 (10.1371/journal.pone.0116955.s012) [file journal.pone.0116955.s012]

# Production run 3

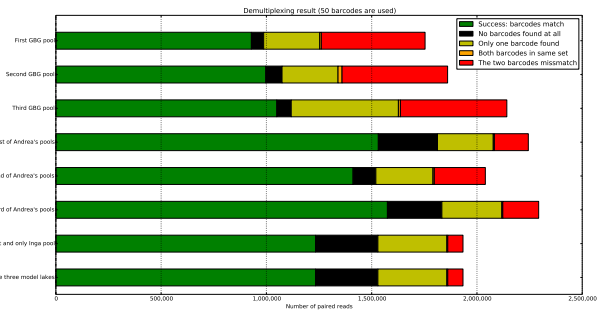

(a) Distribution of barcodes matching and mismatching

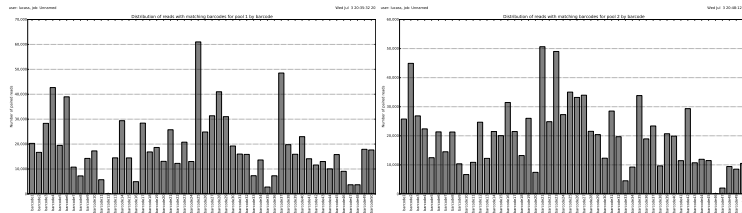

(b) Pool 1

(c) Pool 2

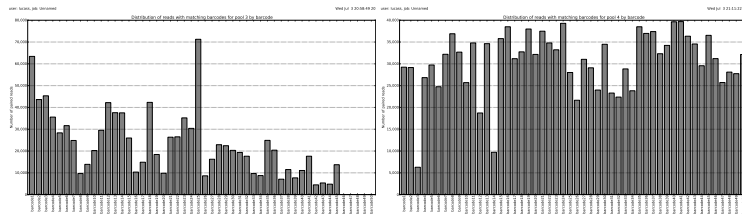

(d) Pool 3

(e) Pool 4

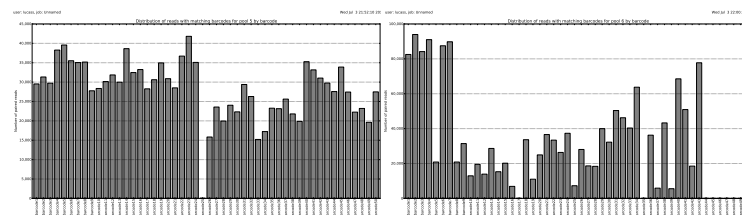

(f) Pool 5

(g) Pool 6

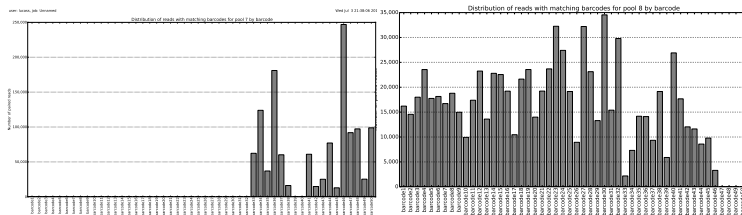

(h) Pool 7

(i) Pool 8
